# Supplementary material
Source: publisher figshare collection journal article supplement (https://acs.figshare.com/ndownloader/files/4664419)
Supplement: Supplementary file 1 [file 4664419]

  
data_hapbr02z 
  
_audit_creation_method            SHELXL-97 
_chemical_name_systematic 
; 
 ? 
; 
_chemical_name_common             ? 
_chemical_melting_point           ? 
_chemical_formula_moiety          'C6 H2 Br N3 O6'  
_chemical_formula_sum 
 'C6 H2 Br N3 O6' 
_chemical_formula_weight          292.02 
  
loop_ 
 _atom_type_symbol 
 _atom_type_description 
 _atom_type_scat_dispersion_real 
 _atom_type_scat_dispersion_imag 
 _atom_type_scat_source 
 'C'  'C'   0.0033   0.0016 
 'International Tables Vol C Tables 4.2.6.8 and 6.1.1.4' 
 'H'  'H'   0.0000   0.0000 
 'International Tables Vol C Tables 4.2.6.8 and 6.1.1.4' 
 'N'  'N'   0.0061   0.0033 
 'International Tables Vol C Tables 4.2.6.8 and 6.1.1.4' 
 'O'  'O'   0.0106   0.0060 
 'International Tables Vol C Tables 4.2.6.8 and 6.1.1.4' 
 'Br'  'Br'  -0.2901   2.4595 
 'International Tables Vol C Tables 4.2.6.8 and 6.1.1.4' 
  
_symmetry_cell_setting            Triclinic 
_symmetry_space_group_name_H-M    P-1 
  
loop_ 
 _symmetry_equiv_pos_as_xyz 
 'x, y, z' 
 '-x, -y, -z' 
  
_cell_length_a                    14.8480(17) 
_cell_length_b                    14.8614(17) 
_cell_length_c                    15.3318(17) 
_cell_angle_alpha                 72.762(2) 
_cell_angle_beta                  80.350(2) 
_cell_angle_gamma                 60.225(2) 
_cell_volume                      2803.8(6) 
_cell_formula_units_Z             12 
_cell_measurement_temperature     93(2) 
_cell_measurement_reflns_used     9020 
_cell_measurement_theta_min       2.39 
_cell_measurement_theta_max       28.89 
  
_exptl_crystal_description        triclinic 
_exptl_crystal_colour             'pale yellow' 
_exptl_crystal_size_max           .24 
_exptl_crystal_size_mid           .18 
_exptl_crystal_size_min           .10 
_exptl_crystal_density_meas       'not measured' 
_exptl_crystal_density_diffrn     2.075 
_exptl_crystal_density_method     'not measured' 
_exptl_crystal_F_000              1704 
_exptl_absorpt_coefficient_mu     4.419 
_exptl_absorpt_correction_type    integration 
_exptl_absorpt_correction_T_min   0.280 
_exptl_absorpt_correction_T_max   0.670 
_exptl_absorpt_process_details    ? 
  
_exptl_special_details 
; 
 ? 
; 
  
_diffrn_ambient_temperature       93(2) 
_diffrn_radiation_wavelength      0.71073 
_diffrn_radiation_type            MoK\a 
_diffrn_radiation_source          'fine-focus sealed tube' 
_diffrn_radiation_monochromator   graphite 
_diffrn_measurement_device_type   'Bruker SMART 1000 CCD area detector' 
_diffrn_measurement_method        'phi and omega scans' 
_diffrn_detector_area_resol_mean  ? 
_diffrn_standards_number          ? 
_diffrn_standards_interval_count  ? 
_diffrn_standards_interval_time   ? 
_diffrn_standards_decay_%         none 
_diffrn_reflns_number             18491 
_diffrn_reflns_av_R_equivalents   0.0251 
_diffrn_reflns_av_sigmaI/netI     0.0522 
_diffrn_reflns_limit_h_min        -17 
_diffrn_reflns_limit_h_max        18 
_diffrn_reflns_limit_k_min        -18 
_diffrn_reflns_limit_k_max        18 
_diffrn_reflns_limit_l_min        -18 
_diffrn_reflns_limit_l_max        18 
_diffrn_reflns_theta_min          1.39 
_diffrn_reflns_theta_max          26.02 
_reflns_number_total              10963 
_reflns_number_gt                 8045 
_reflns_threshold_expression      >2sigma(I) 
  
_computing_data_collection        'Bruker SMART' 
_computing_cell_refinement        'Bruker SMART' 
_computing_data_reduction         'Bruker SHELXTL' 
_computing_structure_solution     'SHELXS-97 (Sheldrick, 1990)' 
_computing_structure_refinement   'SHELXL-97 (Sheldrick, 1997)' 
_computing_molecular_graphics     'Bruker SHELXTL' 
_computing_publication_material   'Bruker SHELXTL' 
  
_refine_special_details 
; 
 Refinement of F^2^ against ALL reflections.  The weighted R-factor wR and 
 goodness of fit S are based on F^2^, conventional R-factors R are based 
 on F, with F set to zero for negative F^2^. The threshold expression of 
 F^2^ > 2sigma(F^2^) is used only for calculating R-factors(gt) etc. and is 
 not relevant to the choice of reflections for refinement.  R-factors based 
 on F^2^ are statistically about twice as large as those based on F, and R- 
 factors based on ALL data will be even larger. 
; 
  
_refine_ls_structure_factor_coef  Fsqd 
_refine_ls_matrix_type            full 
_refine_ls_weighting_scheme       calc 
_refine_ls_weighting_details 
 'calc w=1/[\s^2^(Fo^2^)+(0.0353P)^2^+4.8505P] where P=(Fo^2^+2Fc^2^)/3' 
_atom_sites_solution_primary      direct 
_atom_sites_solution_secondary    difmap 
_atom_sites_solution_hydrogens    geom 
_refine_ls_hydrogen_treatment     mixed 
_refine_ls_extinction_method      none 
_refine_ls_extinction_coef        ? 
_refine_ls_number_reflns          10963 
_refine_ls_number_parameters      865 
_refine_ls_number_restraints      0 
_refine_ls_R_factor_all           0.0639 
_refine_ls_R_factor_gt            0.0397 
_refine_ls_wR_factor_ref          0.0942 
_refine_ls_wR_factor_gt           0.0861 
_refine_ls_goodness_of_fit_ref    1.031 
_refine_ls_restrained_S_all       1.031 
_refine_ls_shift/su_max           0.003 
_refine_ls_shift/su_mean          0.000 
  
loop_ 
 _atom_site_label 
 _atom_site_type_symbol 
 _atom_site_fract_x 
 _atom_site_fract_y 
 _atom_site_fract_z 
 _atom_site_U_iso_or_equiv 
 _atom_site_adp_type 
 _atom_site_occupancy 
 _atom_site_symmetry_multiplicity 
 _atom_site_calc_flag 
 _atom_site_refinement_flags 
 _atom_site_disorder_assembly 
 _atom_site_disorder_group 
Br01 Br 0.17608(3) 0.84377(3) 0.35442(3) 0.02257(11) Uani 1 1 d . . . 
C101 C 0.2567(3) 0.6977(3) 0.3586(3) 0.0164(9) Uani 1 1 d . . . 
C201 C 0.2112(3) 0.6368(3) 0.3540(3) 0.0130(8) Uani 1 1 d . . . 
N201 N 0.0981(3) 0.6855(3) 0.3462(2) 0.0161(8) Uani 1 1 d . . . 
O101 O 0.0426(2) 0.7246(3) 0.4086(2) 0.0248(7) Uani 1 1 d . . . 
O201 O 0.0663(2) 0.6817(2) 0.2800(2) 0.0215(7) Uani 1 1 d . . . 
C301 C 0.2679(3) 0.5290(3) 0.3552(3) 0.0166(9) Uani 1 1 d . . . 
H301 H 0.2349 0.4891 0.3526 0.020 Uiso 1 1 calc R . . 
C401 C 0.3743(3) 0.4824(3) 0.3601(3) 0.0163(9) Uani 1 1 d . . . 
N401 N 0.4365(3) 0.3662(3) 0.3650(2) 0.0215(8) Uani 1 1 d . . . 
O301 O 0.3942(2) 0.3262(2) 0.3389(2) 0.0282(8) Uani 1 1 d . . . 
O401 O 0.5246(2) 0.3196(3) 0.3925(2) 0.0313(8) Uani 1 1 d . . . 
C501 C 0.4252(3) 0.5382(3) 0.3623(3) 0.0185(9) Uani 1 1 d . . . 
H501 H 0.4987 0.5044 0.3645 0.022 Uiso 1 1 calc R . . 
C601 C 0.3648(3) 0.6449(4) 0.3613(3) 0.0180(9) Uani 1 1 d . . . 
N601 N 0.4207(3) 0.7016(3) 0.3682(3) 0.0231(9) Uani 1 1 d . . . 
O501 O 0.4915(3) 0.6971(3) 0.3144(2) 0.0354(9) Uani 1 1 d . . . 
O601 O 0.3903(3) 0.7509(3) 0.4275(3) 0.0479(11) Uani 1 1 d . . . 
Br02 Br -0.19264(3) 0.20839(4) 0.38236(3) 0.02255(11) Uani 1 1 d . . . 
C102 C -0.1184(3) 0.2792(3) 0.3844(3) 0.0152(9) Uani 1 1 d . . . 
C202 C -0.0112(3) 0.2266(3) 0.3940(3) 0.0147(9) Uani 1 1 d . . . 
N202 N 0.0490(3) 0.1103(3) 0.4017(3) 0.0199(8) Uani 1 1 d . . . 
O102 O 0.0479(2) 0.0793(2) 0.3363(2) 0.0269(7) Uani 1 1 d . . . 
O202 O 0.0961(3) 0.0537(3) 0.4716(2) 0.0369(9) Uani 1 1 d . . . 
C302 C 0.0432(3) 0.2784(3) 0.3988(3) 0.0182(9) Uani 1 1 d . . . 
H302 H 0.1163 0.2407 0.4059 0.022 Uiso 1 1 calc R . . 
C402 C -0.0126(3) 0.3861(3) 0.3928(3) 0.0173(9) Uani 1 1 d . . . 
N402 N 0.0431(3) 0.4429(3) 0.4000(3) 0.0222(9) Uani 1 1 d . . . 
O302 O 0.1374(3) 0.3919(3) 0.4065(3) 0.0384(9) Uani 1 1 d . . . 
O402 O -0.0093(3) 0.5381(3) 0.4001(2) 0.0293(8) Uani 1 1 d . . . 
C502 C -0.1192(3) 0.4436(3) 0.3829(3) 0.0181(9) Uani 1 1 d . . . 
H502 H -0.1563 0.5182 0.3791 0.022 Uiso 1 1 calc R . . 
C602 C -0.1688(3) 0.3882(3) 0.3786(3) 0.0146(9) Uani 1 1 d . . . 
N602 N -0.2830(3) 0.4484(3) 0.3665(3) 0.0214(8) Uani 1 1 d . . . 
O502 O -0.3375(2) 0.4639(3) 0.4342(2) 0.0309(8) Uani 1 1 d . . . 
O602 O -0.3131(2) 0.4790(3) 0.2889(2) 0.0372(9) Uani 1 1 d . . . 
Br03 Br 0.81355(3) -0.17133(4) 0.38338(3) 0.02334(11) Uani 1 1 d . . . 
C103 C 0.6677(3) -0.1004(4) 0.3827(3) 0.0166(9) Uani 1 1 d . . . 
C203 C 0.6117(3) 0.0080(3) 0.3778(3) 0.0165(9) Uani 1 1 d . . . 
N203 N 0.6662(3) 0.0694(3) 0.3744(3) 0.0244(9) Uani 1 1 d . . . 
O103 O 0.6852(3) 0.0735(3) 0.4464(2) 0.0342(8) Uani 1 1 d . . . 
O203 O 0.6862(4) 0.1129(4) 0.2994(3) 0.0649(14) Uani 1 1 d . . . 
C303 C 0.5042(3) 0.0643(3) 0.3763(3) 0.0175(9) Uani 1 1 d . . . 
H303 H 0.4674 0.1386 0.3738 0.021 Uiso 1 1 calc R . . 
C403 C 0.4531(3) 0.0071(3) 0.3787(3) 0.0170(9) Uani 1 1 d . . . 
N403 N 0.3394(3) 0.0651(3) 0.3728(3) 0.0221(8) Uani 1 1 d . . . 
O303 O 0.2940(2) 0.1508(3) 0.3953(3) 0.0354(9) Uani 1 1 d . . . 
O403 O 0.2971(2) 0.0270(3) 0.3449(2) 0.0325(8) Uani 1 1 d . . . 
C503 C 0.5040(3) -0.1011(3) 0.3857(3) 0.0178(9) Uani 1 1 d . . . 
H503 H 0.4670 -0.1391 0.3894 0.021 Uiso 1 1 calc R . . 
C603 C 0.6113(3) -0.1527(3) 0.3871(3) 0.0173(9) Uani 1 1 d . . . 
N603 N 0.6653(3) -0.2687(3) 0.3911(2) 0.0187(8) Uani 1 1 d . . . 
O503 O 0.6571(3) -0.3291(3) 0.4605(2) 0.0439(10) Uani 1 1 d . . . 
O603 O 0.7136(3) -0.2959(3) 0.3235(2) 0.0390(9) Uani 1 1 d . . . 
Br04 Br 0.43129(3) -0.75899(4) 0.13978(3) 0.02455(11) Uani 1 1 d . . . 
C104 C 0.3539(3) -0.6114(3) 0.1320(3) 0.0163(9) Uani 1 1 d . . . 
C204 C 0.4000(3) -0.5481(3) 0.1255(3) 0.0164(9) Uani 1 1 d . . . 
N204 N 0.5147(3) -0.5992(3) 0.1278(3) 0.0196(8) Uani 1 1 d . . . 
O104 O 0.5639(2) -0.6333(3) 0.0626(2) 0.0354(9) Uani 1 1 d . . . 
O204 O 0.5513(2) -0.6034(3) 0.1952(2) 0.0289(8) Uani 1 1 d . . . 
C304 C 0.3450(3) -0.4402(3) 0.1209(3) 0.0159(9) Uani 1 1 d . . . 
H304 H 0.3788 -0.3995 0.1189 0.019 Uiso 1 1 calc R . . 
C404 C 0.2371(3) -0.3937(3) 0.1195(3) 0.0142(9) Uani 1 1 d . . . 
N404 N 0.1766(3) -0.2782(3) 0.1117(2) 0.0185(8) Uani 1 1 d . . . 
O304 O 0.2176(2) -0.2355(3) 0.1349(2) 0.0271(7) Uani 1 1 d . . . 
O404 O 0.0874(2) -0.2325(2) 0.0835(2) 0.0242(7) Uani 1 1 d . . . 
C504 C 0.1862(3) -0.4514(3) 0.1268(3) 0.0190(10) Uani 1 1 d . . . 
H504 H 0.1126 -0.4177 0.1261 0.023 Uiso 1 1 calc R . . 
C604 C 0.2453(3) -0.5596(3) 0.1350(3) 0.0146(9) Uani 1 1 d . . . 
N604 N 0.1913(3) -0.6236(3) 0.1455(3) 0.0212(8) Uani 1 1 d . . . 
O504 O 0.1651(5) -0.6550(5) 0.2186(3) 0.099(2) Uani 1 1 d . . . 
O604 O 0.1753(5) -0.6375(5) 0.0799(3) 0.089(2) Uani 1 1 d . . . 
Br05 Br 0.81370(4) -0.13375(4) 0.12045(3) 0.02777(12) Uani 1 1 d . . . 
C105 C 0.7349(3) -0.2006(4) 0.1183(3) 0.0177(9) Uani 1 1 d . . . 
C205 C 0.6273(3) -0.1455(3) 0.1161(3) 0.0165(9) Uani 1 1 d . . . 
N205 N 0.5726(3) -0.0302(3) 0.1145(3) 0.0199(8) Uani 1 1 d . . . 
O105 O 0.5688(5) 0.0316(3) 0.0451(3) 0.112(3) Uani 1 1 d . . . 
O205 O 0.5360(4) -0.0057(3) 0.1831(3) 0.0614(14) Uani 1 1 d . . . 
C305 C 0.5682(3) -0.1931(3) 0.1161(3) 0.0180(9) Uani 1 1 d . . . 
H305 H 0.4945 -0.1546 0.1176 0.022 Uiso 1 1 calc R . . 
C405 C 0.6209(3) -0.3000(3) 0.1140(3) 0.0167(9) Uani 1 1 d . . . 
N405 N 0.5610(3) -0.3521(3) 0.1074(2) 0.0203(8) Uani 1 1 d . . . 
O305 O 0.4663(2) -0.3041(3) 0.1200(2) 0.0322(8) Uani 1 1 d . . . 
O405 O 0.6085(2) -0.4387(2) 0.0877(2) 0.0255(7) Uani 1 1 d . . . 
C505 C 0.7283(3) -0.3595(3) 0.1170(3) 0.0156(9) Uani 1 1 d . . . 
H505 H 0.7629 -0.4331 0.1169 0.019 Uiso 1 1 calc R . . 
C605 C 0.7827(3) -0.3081(4) 0.1200(3) 0.0178(9) Uani 1 1 d . . . 
N605 N 0.8970(3) -0.3721(3) 0.1278(3) 0.0222(9) Uani 1 1 d . . . 
O505 O 0.9484(3) -0.3799(4) 0.0589(3) 0.0672(15) Uani 1 1 d . . . 
O605 O 0.9312(2) -0.4139(3) 0.2032(2) 0.0383(9) Uani 1 1 d . . . 
Br06 Br -0.21068(3) 0.24118(4) 0.12562(3) 0.02262(11) Uani 1 1 d . . . 
C106 C -0.0654(3) 0.1774(3) 0.1246(3) 0.0162(9) Uani 1 1 d . . . 
C206 C -0.0034(3) 0.0685(3) 0.1285(3) 0.0155(9) Uani 1 1 d . . . 
N206 N -0.0527(3) 0.0028(3) 0.1309(3) 0.0200(8) Uani 1 1 d . . . 
O106 O -0.1001(3) 0.0227(3) 0.0636(2) 0.0332(8) Uani 1 1 d . . . 
O206 O -0.0414(3) -0.0689(3) 0.1995(2) 0.0329(8) Uani 1 1 d . . . 
C306 C 0.1041(3) 0.0176(4) 0.1323(3) 0.0195(10) Uani 1 1 d . . . 
H306 H 0.1445 -0.0568 0.1358 0.023 Uiso 1 1 calc R . . 
C406 C 0.1495(3) 0.0792(3) 0.1306(3) 0.0168(9) Uani 1 1 d . . . 
N406 N 0.2643(3) 0.0274(3) 0.1330(3) 0.0247(9) Uani 1 1 d . . . 
O306 O 0.3114(2) -0.0705(3) 0.1502(2) 0.0331(8) Uani 1 1 d . . . 
O406 O 0.3040(2) 0.0858(3) 0.1177(3) 0.0361(9) Uani 1 1 d . . . 
C506 C 0.0933(3) 0.1862(4) 0.1291(3) 0.0174(9) Uani 1 1 d . . . 
H506 H 0.1267 0.2262 0.1303 0.021 Uiso 1 1 calc R . . 
C606 C -0.0135(3) 0.2335(3) 0.1259(3) 0.0161(9) Uani 1 1 d . . . 
N606 N -0.0731(3) 0.3492(3) 0.1231(2) 0.0195(8) Uani 1 1 d . . . 
O506 O -0.0513(2) 0.3770(3) 0.1806(2) 0.0282(8) Uani 1 1 d . . . 
O606 O -0.1362(2) 0.4074(2) 0.0640(2) 0.0288(8) Uani 1 1 d . . . 
  
loop_ 
 _atom_site_aniso_label 
 _atom_site_aniso_U_11 
 _atom_site_aniso_U_22 
 _atom_site_aniso_U_33 
 _atom_site_aniso_U_23 
 _atom_site_aniso_U_13 
 _atom_site_aniso_U_12 
Br01 0.0282(2) 0.0128(2) 0.0246(2) -0.00472(19) -0.00135(18) -0.0079(2) 
C101 0.019(2) 0.014(2) 0.013(2) -0.0029(18) 0.0003(16) -0.0056(19) 
C201 0.0103(19) 0.014(2) 0.012(2) -0.0020(17) -0.0025(15) -0.0040(17) 
N201 0.0130(17) 0.0122(19) 0.020(2) -0.0041(16) 0.0006(14) -0.0040(15) 
O101 0.0152(15) 0.0288(19) 0.0252(18) -0.0123(15) 0.0039(13) -0.0050(14) 
O201 0.0194(15) 0.0290(19) 0.0176(16) -0.0035(14) -0.0051(12) -0.0125(14) 
C301 0.018(2) 0.018(2) 0.015(2) -0.0038(18) -0.0006(16) -0.0104(19) 
C401 0.012(2) 0.015(2) 0.016(2) -0.0027(18) -0.0013(16) -0.0027(18) 
N401 0.022(2) 0.014(2) 0.020(2) -0.0034(16) -0.0011(15) -0.0027(17) 
O301 0.0337(19) 0.0146(17) 0.0298(19) -0.0063(15) -0.0023(14) -0.0059(15) 
O401 0.0192(17) 0.0202(18) 0.036(2) -0.0016(15) -0.0047(14) 0.0025(15) 
C501 0.011(2) 0.020(2) 0.018(2) -0.0005(19) -0.0017(16) -0.0049(19) 
C601 0.021(2) 0.022(2) 0.015(2) -0.0038(19) 0.0011(17) -0.015(2) 
N601 0.0201(19) 0.026(2) 0.025(2) -0.0029(18) -0.0040(16) -0.0136(18) 
O501 0.0310(19) 0.036(2) 0.045(2) -0.0099(18) 0.0075(16) -0.0229(18) 
O601 0.060(3) 0.073(3) 0.046(2) -0.030(2) 0.011(2) -0.052(2) 
Br02 0.0222(2) 0.0225(2) 0.0294(3) -0.0053(2) -0.00340(18) -0.0151(2) 
C102 0.018(2) 0.015(2) 0.015(2) -0.0013(18) -0.0004(16) -0.0112(19) 
C202 0.015(2) 0.010(2) 0.016(2) -0.0013(17) -0.0025(16) -0.0038(18) 
N202 0.0166(18) 0.013(2) 0.026(2) -0.0046(17) -0.0030(15) -0.0039(16) 
O102 0.0322(18) 0.0162(17) 0.0299(19) -0.0116(15) -0.0016(14) -0.0063(15) 
O202 0.043(2) 0.0149(18) 0.035(2) -0.0001(16) -0.0154(17) -0.0002(16) 
C302 0.0107(19) 0.021(2) 0.021(2) -0.0062(19) 0.0026(16) -0.0062(19) 
C402 0.022(2) 0.016(2) 0.019(2) -0.0028(19) -0.0011(17) -0.013(2) 
N402 0.024(2) 0.020(2) 0.030(2) -0.0055(18) 0.0002(16) -0.0163(19) 
O302 0.0232(18) 0.038(2) 0.064(3) -0.020(2) 0.0039(17) -0.0197(18) 
O402 0.041(2) 0.0192(19) 0.034(2) -0.0048(15) -0.0070(15) -0.0186(17) 
C502 0.019(2) 0.014(2) 0.017(2) -0.0060(18) 0.0041(17) -0.0052(19) 
C602 0.0073(18) 0.018(2) 0.013(2) -0.0036(18) -0.0019(15) -0.0017(17) 
N602 0.0132(18) 0.018(2) 0.029(2) -0.0046(18) -0.0025(16) -0.0051(17) 
O502 0.0171(16) 0.041(2) 0.0242(18) -0.0054(16) 0.0006(13) -0.0080(16) 
O602 0.0203(17) 0.050(2) 0.025(2) -0.0055(17) -0.0093(14) -0.0043(17) 
Br03 0.0116(2) 0.0264(3) 0.0267(3) -0.0052(2) -0.00088(17) -0.00582(19) 
C103 0.0103(19) 0.020(2) 0.016(2) -0.0051(19) 0.0002(16) -0.0048(18) 
C203 0.014(2) 0.017(2) 0.020(2) -0.0021(18) -0.0019(16) -0.0095(19) 
N203 0.021(2) 0.016(2) 0.037(3) -0.0040(18) 0.0004(17) -0.0119(18) 
O103 0.037(2) 0.031(2) 0.042(2) -0.0022(17) -0.0170(16) -0.0212(18) 
O203 0.111(4) 0.094(4) 0.039(2) -0.015(2) 0.020(2) -0.092(3) 
C303 0.016(2) 0.010(2) 0.024(2) -0.0052(19) 0.0000(17) -0.0039(18) 
C403 0.012(2) 0.016(2) 0.023(2) -0.0061(19) 0.0021(17) -0.0067(18) 
N403 0.0136(18) 0.018(2) 0.030(2) -0.0031(18) -0.0022(15) -0.0049(17) 
O303 0.0200(17) 0.0213(19) 0.056(2) -0.0127(18) 0.0021(16) -0.0023(15) 
O403 0.0201(17) 0.033(2) 0.045(2) -0.0095(17) -0.0091(15) -0.0108(16) 
C503 0.018(2) 0.020(2) 0.020(2) -0.0034(19) -0.0017(17) -0.012(2) 
C603 0.019(2) 0.014(2) 0.018(2) -0.0043(18) 0.0029(17) -0.0086(19) 
N603 0.0140(18) 0.014(2) 0.024(2) -0.0049(17) -0.0013(15) -0.0030(16) 
O503 0.064(3) 0.0173(19) 0.032(2) 0.0034(16) 0.0115(18) -0.0146(19) 
O603 0.053(2) 0.0174(19) 0.0245(19) -0.0054(15) 0.0064(17) -0.0025(17) 
Br04 0.0272(2) 0.0115(2) 0.0287(3) -0.00564(19) -0.00062(19) -0.0043(2) 
C104 0.017(2) 0.012(2) 0.016(2) -0.0051(18) 0.0001(16) -0.0033(18) 
C204 0.011(2) 0.019(2) 0.019(2) -0.0036(19) 0.0022(16) -0.0078(19) 
N204 0.0127(18) 0.018(2) 0.025(2) -0.0017(17) -0.0009(16) -0.0065(16) 
O104 0.0151(16) 0.049(2) 0.039(2) -0.0235(19) 0.0058(14) -0.0078(16) 
O204 0.0172(16) 0.038(2) 0.0276(19) -0.0022(16) -0.0038(13) -0.0130(16) 
C304 0.015(2) 0.016(2) 0.019(2) -0.0058(18) -0.0008(16) -0.0078(19) 
C404 0.0121(19) 0.012(2) 0.013(2) -0.0024(17) -0.0033(15) -0.0004(17) 
N404 0.0175(19) 0.015(2) 0.020(2) -0.0034(16) 0.0002(15) -0.0059(17) 
O304 0.0260(17) 0.0188(18) 0.038(2) -0.0110(15) -0.0015(14) -0.0097(15) 
O404 0.0171(16) 0.0199(17) 0.0234(17) -0.0015(14) -0.0020(13) -0.0015(14) 
C504 0.011(2) 0.017(2) 0.024(2) -0.0041(19) -0.0003(17) -0.0036(19) 
C604 0.017(2) 0.016(2) 0.014(2) -0.0007(18) -0.0008(16) -0.0118(19) 
N604 0.023(2) 0.021(2) 0.023(2) -0.0046(18) 0.0014(16) -0.0144(18) 
O504 0.173(6) 0.188(6) 0.032(3) 0.004(3) -0.003(3) -0.174(6) 
O604 0.183(6) 0.146(5) 0.036(3) -0.029(3) 0.022(3) -0.154(5) 
Br05 0.0346(3) 0.0356(3) 0.0302(3) -0.0111(2) 0.0021(2) -0.0285(2) 
C105 0.023(2) 0.024(3) 0.016(2) -0.0041(19) -0.0007(17) -0.019(2) 
C205 0.024(2) 0.010(2) 0.015(2) -0.0034(18) 0.0004(17) -0.0082(19) 
N205 0.0208(19) 0.016(2) 0.020(2) -0.0024(17) -0.0043(15) -0.0063(17) 
O105 0.234(7) 0.016(2) 0.035(3) -0.004(2) 0.029(3) -0.033(3) 
O205 0.101(4) 0.018(2) 0.028(2) -0.0083(18) 0.004(2) -0.002(2) 
C305 0.014(2) 0.012(2) 0.020(2) -0.0006(18) -0.0001(17) -0.0022(18) 
C405 0.0106(19) 0.017(2) 0.024(2) -0.0079(19) 0.0001(16) -0.0064(18) 
N405 0.023(2) 0.022(2) 0.021(2) -0.0040(17) -0.0021(15) -0.0142(18) 
O305 0.0151(16) 0.034(2) 0.055(2) -0.0217(18) 0.0056(15) -0.0141(16) 
O405 0.0244(17) 0.0172(18) 0.039(2) -0.0097(15) -0.0057(14) -0.0098(15) 
C505 0.0105(19) 0.011(2) 0.020(2) -0.0026(18) -0.0035(16) -0.0016(17) 
C605 0.014(2) 0.018(2) 0.018(2) -0.0024(19) 0.0001(17) -0.0067(19) 
N605 0.0143(18) 0.023(2) 0.029(2) -0.0069(18) -0.0019(16) -0.0088(17) 
O505 0.0185(19) 0.128(4) 0.028(2) -0.013(2) 0.0067(16) -0.020(2) 
O605 0.0234(18) 0.043(2) 0.033(2) -0.0006(18) -0.0111(15) -0.0066(17) 
Br06 0.0115(2) 0.0266(3) 0.0264(3) -0.0054(2) 0.00012(17) -0.00741(19) 
C106 0.012(2) 0.017(2) 0.019(2) -0.0052(19) 0.0004(16) -0.0070(18) 
C206 0.020(2) 0.015(2) 0.015(2) -0.0016(18) 0.0021(16) -0.0134(19) 
N206 0.0170(19) 0.021(2) 0.030(2) -0.0092(18) 0.0021(16) -0.0142(17) 
O106 0.039(2) 0.038(2) 0.038(2) -0.0056(17) -0.0087(16) -0.0288(18) 
O206 0.043(2) 0.0256(19) 0.036(2) -0.0003(17) 0.0015(16) -0.0258(17) 
C306 0.020(2) 0.013(2) 0.020(2) -0.0044(19) -0.0001(18) -0.0046(19) 
C406 0.0090(19) 0.018(2) 0.018(2) -0.0033(18) -0.0012(16) -0.0019(18) 
N406 0.0133(18) 0.022(2) 0.036(2) -0.0075(19) 0.0030(16) -0.0070(18) 
O306 0.0155(16) 0.0184(19) 0.057(2) -0.0099(17) -0.0024(15) -0.0009(15) 
O406 0.0180(17) 0.031(2) 0.066(3) -0.0167(19) 0.0029(16) -0.0151(16) 
C506 0.016(2) 0.023(2) 0.020(2) -0.0092(19) 0.0020(17) -0.013(2) 
C606 0.016(2) 0.012(2) 0.017(2) -0.0047(18) 0.0007(16) -0.0041(18) 
N606 0.0143(18) 0.019(2) 0.023(2) -0.0048(17) 0.0004(15) -0.0065(17) 
O506 0.0321(18) 0.0218(18) 0.0327(19) -0.0113(15) -0.0036(15) -0.0110(16) 
O606 0.0279(18) 0.0146(17) 0.0319(19) -0.0029(15) -0.0077(15) -0.0007(15) 
  
_geom_special_details 
; 
 All esds (except the esd in the dihedral angle between two l.s. planes) 
 are estimated using the full covariance matrix.  The cell esds are taken 
 into account individually in the estimation of esds in distances, angles 
 and torsion angles; correlations between esds in cell parameters are only 
 used when they are defined by crystal symmetry.  An approximate (isotropic) 
 treatment of cell esds is used for estimating esds involving l.s. planes. 
; 
  
loop_ 
 _geom_bond_atom_site_label_1 
 _geom_bond_atom_site_label_2 
 _geom_bond_distance 
 _geom_bond_site_symmetry_2 
 _geom_bond_publ_flag 
Br01 C101 1.874(4) . ? 
Br01 O102 2.989(3) 1_565 ? 
C101 C201 1.393(6) . ? 
C101 C601 1.395(6) . ? 
C201 C301 1.387(6) . ? 
C201 N201 1.473(5) . ? 
N201 O201 1.217(4) . ? 
N201 O101 1.232(4) . ? 
C301 C401 1.379(6) . ? 
C301 H301 0.9500 . ? 
C401 C501 1.382(6) . ? 
C401 N401 1.484(5) . ? 
N401 O401 1.217(5) . ? 
N401 O301 1.227(5) . ? 
C501 C601 1.377(6) . ? 
C501 H501 0.9500 . ? 
C601 N601 1.479(5) . ? 
N601 O501 1.208(5) . ? 
N601 O601 1.224(5) . ? 
Br02 C102 1.873(4) . ? 
Br02 O103 3.181(3) 1_455 ? 
C102 C602 1.387(6) . ? 
C102 C202 1.393(6) . ? 
C202 C302 1.386(6) . ? 
C202 N202 1.477(5) . ? 
N202 O202 1.215(5) . ? 
N202 O102 1.228(5) . ? 
C302 C402 1.372(6) . ? 
C302 H302 0.9500 . ? 
C402 C502 1.385(6) . ? 
C402 N402 1.477(5) . ? 
N402 O302 1.223(5) . ? 
N402 O402 1.231(5) . ? 
C502 C602 1.370(6) . ? 
C502 H502 0.9500 . ? 
C602 N602 1.486(5) . ? 
N602 O502 1.208(4) . ? 
N602 O602 1.216(5) . ? 
Br03 C103 1.881(4) . ? 
Br03 O101 2.995(3) 1_645 ? 
C103 C603 1.379(6) . ? 
C103 C203 1.382(6) . ? 
C203 C303 1.387(6) . ? 
C203 N203 1.477(5) . ? 
N203 O103 1.210(5) . ? 
N203 O203 1.211(5) . ? 
C303 C403 1.383(6) . ? 
C303 H303 0.9500 . ? 
C403 C503 1.374(6) . ? 
C403 N403 1.469(5) . ? 
N403 O403 1.219(5) . ? 
N403 O303 1.236(5) . ? 
C503 C603 1.384(6) . ? 
C503 H503 0.9500 . ? 
C603 N603 1.484(5) . ? 
N603 O503 1.205(5) . ? 
N603 O603 1.209(4) . ? 
Br04 C104 1.880(4) . ? 
Br04 O205 3.089(4) 1_545 ? 
C104 C204 1.386(6) . ? 
C104 C604 1.400(5) . ? 
C204 C304 1.377(6) . ? 
C204 N204 1.483(5) . ? 
N204 O104 1.214(4) . ? 
N204 O204 1.219(5) . ? 
C304 C404 1.395(5) . ? 
C304 H304 0.9500 . ? 
C404 C504 1.371(6) . ? 
C404 N404 1.467(5) . ? 
N404 O304 1.222(4) . ? 
N404 O404 1.235(4) . ? 
C504 C604 1.373(6) . ? 
C504 H504 0.9500 . ? 
C604 N604 1.482(5) . ? 
N604 O504 1.162(5) . ? 
N604 O604 1.167(5) . ? 
Br05 C105 1.883(4) . ? 
Br05 O106 3.030(3) 1_655 ? 
C105 C605 1.383(6) . ? 
C105 C205 1.387(6) . ? 
C205 C305 1.374(6) . ? 
C205 N205 1.482(5) . ? 
N205 O105 1.170(5) . ? 
N205 O205 1.172(5) . ? 
C305 C405 1.387(6) . ? 
C305 H305 0.9500 . ? 
C405 C505 1.388(5) . ? 
C405 N405 1.471(5) . ? 
N405 O405 1.226(5) . ? 
N405 O305 1.231(4) . ? 
C505 C605 1.373(6) . ? 
C505 H505 0.9500 . ? 
C605 N605 1.481(5) . ? 
N605 O505 1.195(5) . ? 
N605 O605 1.199(5) . ? 
Br06 C106 1.875(4) . ? 
Br06 O104 3.071(3) 1_465 ? 
C106 C606 1.395(6) . ? 
C106 C206 1.396(6) . ? 
C206 C306 1.388(6) . ? 
C206 N206 1.474(5) . ? 
N206 O206 1.219(5) . ? 
N206 O106 1.227(5) . ? 
C306 C406 1.374(6) . ? 
C306 H306 0.9500 . ? 
C406 C506 1.376(6) . ? 
C406 N406 1.483(5) . ? 
N406 O406 1.223(5) . ? 
N406 O306 1.225(5) . ? 
C506 C606 1.381(6) . ? 
C506 H506 0.9500 . ? 
C606 N606 1.483(5) . ? 
N606 O606 1.210(5) . ? 
N606 O506 1.223(5) . ? 
  
loop_ 
 _geom_angle_atom_site_label_1 
 _geom_angle_atom_site_label_2 
 _geom_angle_atom_site_label_3 
 _geom_angle 
 _geom_angle_site_symmetry_1 
 _geom_angle_site_symmetry_3 
 _geom_angle_publ_flag 
C101 Br01 O102 176.75(14) . 1_565 ? 
C201 C101 C601 116.1(4) . . ? 
C201 C101 Br01 121.1(3) . . ? 
C601 C101 Br01 122.7(3) . . ? 
C301 C201 C101 123.1(4) . . ? 
C301 C201 N201 116.1(4) . . ? 
C101 C201 N201 120.8(4) . . ? 
O201 N201 O101 124.7(3) . . ? 
O201 N201 C201 117.6(3) . . ? 
O101 N201 C201 117.6(3) . . ? 
C401 C301 C201 117.1(4) . . ? 
C401 C301 H301 121.4 . . ? 
C201 C301 H301 121.4 . . ? 
C301 C401 C501 123.1(4) . . ? 
C301 C401 N401 118.2(4) . . ? 
C501 C401 N401 118.6(4) . . ? 
O401 N401 O301 125.8(4) . . ? 
O401 N401 C401 118.0(4) . . ? 
O301 N401 C401 116.2(4) . . ? 
C601 C501 C401 117.1(4) . . ? 
C601 C501 H501 121.4 . . ? 
C401 C501 H501 121.4 . . ? 
C501 C601 C101 123.4(4) . . ? 
C501 C601 N601 116.1(4) . . ? 
C101 C601 N601 120.4(4) . . ? 
O501 N601 O601 125.2(4) . . ? 
O501 N601 C601 117.9(4) . . ? 
O601 N601 C601 116.9(3) . . ? 
C102 Br02 O103 161.96(14) . 1_455 ? 
C602 C102 C202 116.1(4) . . ? 
C602 C102 Br02 121.0(3) . . ? 
C202 C102 Br02 122.8(3) . . ? 
C302 C202 C102 122.8(4) . . ? 
C302 C202 N202 117.1(3) . . ? 
C102 C202 N202 120.1(4) . . ? 
O202 N202 O102 125.6(4) . . ? 
O202 N202 C202 117.5(4) . . ? 
O102 N202 C202 116.9(4) . . ? 
C402 C302 C202 117.3(4) . . ? 
C402 C302 H302 121.3 . . ? 
C202 C302 H302 121.3 . . ? 
C302 C402 C502 122.9(4) . . ? 
C302 C402 N402 118.5(4) . . ? 
C502 C402 N402 118.5(4) . . ? 
O302 N402 O402 124.6(4) . . ? 
O302 N402 C402 117.9(4) . . ? 
O402 N402 C402 117.4(4) . . ? 
C602 C502 C402 117.1(4) . . ? 
C602 C502 H502 121.4 . . ? 
C402 C502 H502 121.4 . . ? 
C502 C602 C102 123.7(4) . . ? 
C502 C602 N602 118.1(4) . . ? 
C102 C602 N602 118.2(4) . . ? 
O502 N602 O602 125.8(4) . . ? 
O502 N602 C602 117.4(4) . . ? 
O602 N602 C602 116.8(3) . . ? 
C103 Br03 O101 172.06(14) . 1_645 ? 
C603 C103 C203 116.8(4) . . ? 
C603 C103 Br03 122.4(3) . . ? 
C203 C103 Br03 120.8(3) . . ? 
C103 C203 C303 123.2(4) . . ? 
C103 C203 N203 120.1(4) . . ? 
C303 C203 N203 116.7(4) . . ? 
O103 N203 O203 125.7(4) . . ? 
O103 N203 C203 117.5(4) . . ? 
O203 N203 C203 116.8(4) . . ? 
C403 C303 C203 116.8(4) . . ? 
C403 C303 H303 121.6 . . ? 
C203 C303 H303 121.6 . . ? 
C503 C403 C303 122.9(4) . . ? 
C503 C403 N403 118.8(4) . . ? 
C303 C403 N403 118.4(4) . . ? 
O403 N403 O303 124.8(4) . . ? 
O403 N403 C403 118.5(4) . . ? 
O303 N403 C403 116.7(4) . . ? 
C403 C503 C603 117.4(4) . . ? 
C403 C503 H503 121.3 . . ? 
C603 C503 H503 121.3 . . ? 
C103 C603 C503 123.0(4) . . ? 
C103 C603 N603 120.3(4) . . ? 
C503 C603 N603 116.7(4) . . ? 
O503 N603 O603 124.5(4) . . ? 
O503 N603 C603 118.1(3) . . ? 
O603 N603 C603 117.4(4) . . ? 
C104 Br04 O205 170.09(14) . 1_545 ? 
C204 C104 C604 116.1(4) . . ? 
C204 C104 Br04 122.6(3) . . ? 
C604 C104 Br04 121.3(3) . . ? 
C304 C204 C104 123.7(4) . . ? 
C304 C204 N204 117.4(4) . . ? 
C104 C204 N204 118.9(4) . . ? 
O104 N204 O204 125.8(4) . . ? 
O104 N204 C204 117.4(4) . . ? 
O204 N204 C204 116.8(3) . . ? 
C204 C304 C404 116.5(4) . . ? 
C204 C304 H304 121.7 . . ? 
C404 C304 H304 121.7 . . ? 
C504 C404 C304 123.0(4) . . ? 
C504 C404 N404 119.2(3) . . ? 
C304 C404 N404 117.8(4) . . ? 
O304 N404 O404 125.5(4) . . ? 
O304 N404 C404 117.5(3) . . ? 
O404 N404 C404 117.0(4) . . ? 
C404 C504 C604 117.7(4) . . ? 
C404 C504 H504 121.1 . . ? 
C604 C504 H504 121.1 . . ? 
C504 C604 C104 122.9(4) . . ? 
C504 C604 N604 118.4(4) . . ? 
C104 C604 N604 118.7(4) . . ? 
O504 N604 O604 123.7(4) . . ? 
O504 N604 C604 117.9(4) . . ? 
O604 N604 C604 118.4(4) . . ? 
C105 Br05 O106 160.04(15) . 1_655 ? 
C605 C105 C205 117.2(4) . . ? 
C605 C105 Br05 120.7(3) . . ? 
C205 C105 Br05 122.1(3) . . ? 
C305 C205 C105 123.0(4) . . ? 
C305 C205 N205 117.9(4) . . ? 
C105 C205 N205 119.1(4) . . ? 
O105 N205 O205 123.3(4) . . ? 
O105 N205 C205 118.5(4) . . ? 
O205 N205 C205 118.2(4) . . ? 
C205 C305 C405 117.0(4) . . ? 
C205 C305 H305 121.5 . . ? 
C405 C305 H305 121.5 . . ? 
C305 C405 C505 122.5(4) . . ? 
C305 C405 N405 118.8(4) . . ? 
C505 C405 N405 118.7(4) . . ? 
O405 N405 O305 124.9(4) . . ? 
O405 N405 C405 117.7(3) . . ? 
O305 N405 C405 117.4(4) . . ? 
C605 C505 C405 117.6(4) . . ? 
C605 C505 H505 121.2 . . ? 
C405 C505 H505 121.2 . . ? 
C505 C605 C105 122.6(4) . . ? 
C505 C605 N605 118.0(4) . . ? 
C105 C605 N605 119.4(4) . . ? 
O505 N605 O605 124.6(4) . . ? 
O505 N605 C605 117.9(4) . . ? 
O605 N605 C605 117.5(3) . . ? 
C106 Br06 O104 161.96(14) . 1_465 ? 
C606 C106 C206 116.2(4) . . ? 
C606 C106 Br06 122.3(3) . . ? 
C206 C106 Br06 121.4(3) . . ? 
C306 C206 C106 122.9(4) . . ? 
C306 C206 N206 117.6(4) . . ? 
C106 C206 N206 119.5(4) . . ? 
O206 N206 O106 125.0(4) . . ? 
O206 N206 C206 117.1(4) . . ? 
O106 N206 C206 117.9(4) . . ? 
C406 C306 C206 117.3(4) . . ? 
C406 C306 H306 121.3 . . ? 
C206 C306 H306 121.3 . . ? 
C306 C406 C506 123.0(4) . . ? 
C306 C406 N406 118.6(4) . . ? 
C506 C406 N406 118.4(4) . . ? 
O406 N406 O306 125.5(4) . . ? 
O406 N406 C406 117.5(4) . . ? 
O306 N406 C406 117.0(4) . . ? 
C406 C506 C606 117.7(4) . . ? 
C406 C506 H506 121.1 . . ? 
C606 C506 H506 121.1 . . ? 
C506 C606 C106 122.8(4) . . ? 
C506 C606 N606 117.2(4) . . ? 
C106 C606 N606 120.0(4) . . ? 
O606 N606 O506 126.0(4) . . ? 
O606 N606 C606 118.1(4) . . ? 
O506 N606 C606 115.9(4) . . ? 
  
loop_ 
 _geom_torsion_atom_site_label_1 
 _geom_torsion_atom_site_label_2 
 _geom_torsion_atom_site_label_3 
 _geom_torsion_atom_site_label_4 
 _geom_torsion 
 _geom_torsion_site_symmetry_1 
 _geom_torsion_site_symmetry_2 
 _geom_torsion_site_symmetry_3 
 _geom_torsion_site_symmetry_4 
 _geom_torsion_publ_flag 
O102 Br01 C101 C201 -84(3) 1_565 . . . ? 
O102 Br01 C101 C601 93(3) 1_565 . . . ? 
C601 C101 C201 C301 2.1(6) . . . . ? 
Br01 C101 C201 C301 178.8(3) . . . . ? 
C601 C101 C201 N201 -177.0(4) . . . . ? 
Br01 C101 C201 N201 -0.3(5) . . . . ? 
C301 C201 N201 O201 -58.1(5) . . . . ? 
C101 C201 N201 O201 121.0(4) . . . . ? 
C301 C201 N201 O101 119.9(4) . . . . ? 
C101 C201 N201 O101 -61.0(5) . . . . ? 
C101 C201 C301 C401 -0.7(6) . . . . ? 
N201 C201 C301 C401 178.4(4) . . . . ? 
C201 C301 C401 C501 -1.1(6) . . . . ? 
C201 C301 C401 N401 177.7(4) . . . . ? 
C301 C401 N401 O401 -161.5(4) . . . . ? 
C501 C401 N401 O401 17.4(6) . . . . ? 
C301 C401 N401 O301 19.9(5) . . . . ? 
C501 C401 N401 O301 -161.3(4) . . . . ? 
C301 C401 C501 C601 1.3(6) . . . . ? 
N401 C401 C501 C601 -177.5(4) . . . . ? 
C401 C501 C601 C101 0.3(6) . . . . ? 
C401 C501 C601 N601 177.2(4) . . . . ? 
C201 C101 C601 C501 -1.9(6) . . . . ? 
Br01 C101 C601 C501 -178.5(3) . . . . ? 
C201 C101 C601 N601 -178.7(4) . . . . ? 
Br01 C101 C601 N601 4.7(6) . . . . ? 
C501 C601 N601 O501 53.4(5) . . . . ? 
C101 C601 N601 O501 -129.6(4) . . . . ? 
C501 C601 N601 O601 -127.6(4) . . . . ? 
C101 C601 N601 O601 49.4(6) . . . . ? 
O103 Br02 C102 C602 -94.8(5) 1_455 . . . ? 
O103 Br02 C102 C202 83.5(6) 1_455 . . . ? 
C602 C102 C202 C302 0.7(6) . . . . ? 
Br02 C102 C202 C302 -177.6(3) . . . . ? 
C602 C102 C202 N202 179.3(4) . . . . ? 
Br02 C102 C202 N202 1.0(5) . . . . ? 
C302 C202 N202 O202 60.3(5) . . . . ? 
C102 C202 N202 O202 -118.4(4) . . . . ? 
C302 C202 N202 O102 -119.1(4) . . . . ? 
C102 C202 N202 O102 62.2(5) . . . . ? 
C102 C202 C302 C402 -0.6(6) . . . . ? 
N202 C202 C302 C402 -179.2(4) . . . . ? 
C202 C302 C402 C502 0.3(6) . . . . ? 
C202 C302 C402 N402 178.5(4) . . . . ? 
C302 C402 N402 O302 3.6(6) . . . . ? 
C502 C402 N402 O302 -178.2(4) . . . . ? 
C302 C402 N402 O402 -175.7(4) . . . . ? 
C502 C402 N402 O402 2.6(6) . . . . ? 
C302 C402 C502 C602 -0.3(6) . . . . ? 
N402 C402 C502 C602 -178.4(4) . . . . ? 
C402 C502 C602 C102 0.4(6) . . . . ? 
C402 C502 C602 N602 -179.1(4) . . . . ? 
C202 C102 C602 C502 -0.7(6) . . . . ? 
Br02 C102 C602 C502 177.7(3) . . . . ? 
C202 C102 C602 N602 178.9(4) . . . . ? 
Br02 C102 C602 N602 -2.8(5) . . . . ? 
C502 C602 N602 O502 -83.5(5) . . . . ? 
C102 C602 N602 O502 97.0(5) . . . . ? 
C502 C602 N602 O602 95.6(5) . . . . ? 
C102 C602 N602 O602 -83.9(5) . . . . ? 
O101 Br03 C103 C603 -118.3(10) 1_645 . . . ? 
O101 Br03 C103 C203 61.5(12) 1_645 . . . ? 
C603 C103 C203 C303 -0.7(6) . . . . ? 
Br03 C103 C203 C303 179.5(3) . . . . ? 
C603 C103 C203 N203 178.9(4) . . . . ? 
Br03 C103 C203 N203 -0.9(6) . . . . ? 
C103 C203 N203 O103 -88.4(5) . . . . ? 
C303 C203 N203 O103 91.3(5) . . . . ? 
C103 C203 N203 O203 93.0(5) . . . . ? 
C303 C203 N203 O203 -87.4(5) . . . . ? 
C103 C203 C303 C403 -0.9(6) . . . . ? 
N203 C203 C303 C403 179.4(4) . . . . ? 
C203 C303 C403 C503 2.5(6) . . . . ? 
C203 C303 C403 N403 -177.1(4) . . . . ? 
C503 C403 N403 O403 -23.6(6) . . . . ? 
C303 C403 N403 O403 156.0(4) . . . . ? 
C503 C403 N403 O303 157.8(4) . . . . ? 
C303 C403 N403 O303 -22.6(6) . . . . ? 
C303 C403 C503 C603 -2.3(6) . . . . ? 
N403 C403 C503 C603 177.3(4) . . . . ? 
C203 C103 C603 C503 0.9(6) . . . . ? 
Br03 C103 C603 C503 -179.3(3) . . . . ? 
C203 C103 C603 N603 179.1(4) . . . . ? 
Br03 C103 C603 N603 -1.1(6) . . . . ? 
C403 C503 C603 C103 0.5(6) . . . . ? 
C403 C503 C603 N603 -177.7(4) . . . . ? 
C103 C603 N603 O503 112.4(5) . . . . ? 
C503 C603 N603 O503 -69.3(5) . . . . ? 
C103 C603 N603 O603 -68.5(5) . . . . ? 
C503 C603 N603 O603 109.7(5) . . . . ? 
O205 Br04 C104 C204 124.6(9) 1_545 . . . ? 
O205 Br04 C104 C604 -53.6(11) 1_545 . . . ? 
C604 C104 C204 C304 -0.9(6) . . . . ? 
Br04 C104 C204 C304 -179.1(3) . . . . ? 
C604 C104 C204 N204 176.3(4) . . . . ? 
Br04 C104 C204 N204 -2.0(5) . . . . ? 
C304 C204 N204 O104 -113.9(5) . . . . ? 
C104 C204 N204 O104 68.8(5) . . . . ? 
C304 C204 N204 O204 66.3(5) . . . . ? 
C104 C204 N204 O204 -111.0(5) . . . . ? 
C104 C204 C304 C404 -2.4(6) . . . . ? 
N204 C204 C304 C404 -179.6(4) . . . . ? 
C204 C304 C404 C504 3.2(6) . . . . ? 
C204 C304 C404 N404 -178.1(4) . . . . ? 
C504 C404 N404 O304 156.6(4) . . . . ? 
C304 C404 N404 O304 -22.2(5) . . . . ? 
C504 C404 N404 O404 -22.2(5) . . . . ? 
C304 C404 N404 O404 159.0(4) . . . . ? 
C304 C404 C504 C604 -0.5(6) . . . . ? 
N404 C404 C504 C604 -179.3(4) . . . . ? 
C404 C504 C604 C104 -3.1(6) . . . . ? 
C404 C504 C604 N604 178.4(4) . . . . ? 
C204 C104 C604 C504 3.7(6) . . . . ? 
Br04 C104 C604 C504 -178.0(3) . . . . ? 
C204 C104 C604 N604 -177.7(4) . . . . ? 
Br04 C104 C604 N604 0.6(5) . . . . ? 
C504 C604 N604 O504 -85.8(6) . . . . ? 
C104 C604 N604 O504 95.6(6) . . . . ? 
C504 C604 N604 O604 92.4(6) . . . . ? 
C104 C604 N604 O604 -86.2(6) . . . . ? 
O106 Br05 C105 C605 123.4(4) 1_655 . . . ? 
O106 Br05 C105 C205 -57.5(6) 1_655 . . . ? 
C605 C105 C205 C305 0.4(6) . . . . ? 
Br05 C105 C205 C305 -178.8(3) . . . . ? 
C605 C105 C205 N205 179.8(4) . . . . ? 
Br05 C105 C205 N205 0.6(5) . . . . ? 
C305 C205 N205 O105 -101.2(6) . . . . ? 
C105 C205 N205 O105 79.4(7) . . . . ? 
C305 C205 N205 O205 79.2(6) . . . . ? 
C105 C205 N205 O205 -100.2(5) . . . . ? 
C105 C205 C305 C405 -3.1(6) . . . . ? 
N205 C205 C305 C405 177.5(4) . . . . ? 
C205 C305 C405 C505 3.7(6) . . . . ? 
C205 C305 C405 N405 -175.7(4) . . . . ? 
C305 C405 N405 O405 166.1(4) . . . . ? 
C505 C405 N405 O405 -13.3(6) . . . . ? 
C305 C405 N405 O305 -12.4(6) . . . . ? 
C505 C405 N405 O305 168.3(4) . . . . ? 
C305 C405 C505 C605 -1.5(6) . . . . ? 
N405 C405 C505 C605 177.8(4) . . . . ? 
C405 C505 C605 C105 -1.4(6) . . . . ? 
C405 C505 C605 N605 177.0(4) . . . . ? 
C205 C105 C605 C505 1.9(6) . . . . ? 
Br05 C105 C605 C505 -178.9(3) . . . . ? 
C205 C105 C605 N605 -176.5(4) . . . . ? 
Br05 C105 C605 N605 2.7(5) . . . . ? 
C505 C605 N605 O505 89.3(6) . . . . ? 
C105 C605 N605 O505 -92.3(6) . . . . ? 
C505 C605 N605 O605 -89.6(5) . . . . ? 
C105 C605 N605 O605 88.8(5) . . . . ? 
O104 Br06 C106 C606 85.1(6) 1_465 . . . ? 
O104 Br06 C106 C206 -99.2(5) 1_465 . . . ? 
C606 C106 C206 C306 -0.8(6) . . . . ? 
Br06 C106 C206 C306 -176.8(3) . . . . ? 
C606 C106 C206 N206 177.7(4) . . . . ? 
Br06 C106 C206 N206 1.7(5) . . . . ? 
C306 C206 N206 O206 62.6(5) . . . . ? 
C106 C206 N206 O206 -116.0(4) . . . . ? 
C306 C206 N206 O106 -116.0(4) . . . . ? 
C106 C206 N206 O106 65.4(5) . . . . ? 
C106 C206 C306 C406 -1.0(6) . . . . ? 
N206 C206 C306 C406 -179.5(4) . . . . ? 
C206 C306 C406 C506 2.6(6) . . . . ? 
C206 C306 C406 N406 -179.0(4) . . . . ? 
C306 C406 N406 O406 169.2(4) . . . . ? 
C506 C406 N406 O406 -12.3(6) . . . . ? 
C306 C406 N406 O306 -10.8(6) . . . . ? 
C506 C406 N406 O306 167.7(4) . . . . ? 
C306 C406 C506 C606 -2.3(6) . . . . ? 
N406 C406 C506 C606 179.3(4) . . . . ? 
C406 C506 C606 C106 0.3(6) . . . . ? 
C406 C506 C606 N606 -179.3(4) . . . . ? 
C206 C106 C606 C506 1.2(6) . . . . ? 
Br06 C106 C606 C506 177.1(3) . . . . ? 
C206 C106 C606 N606 -179.3(4) . . . . ? 
Br06 C106 C606 N606 -3.3(6) . . . . ? 
C506 C606 N606 O606 128.6(4) . . . . ? 
C106 C606 N606 O606 -51.0(5) . . . . ? 
C506 C606 N606 O506 -49.6(5) . . . . ? 
C106 C606 N606 O506 130.8(4) . . . . ? 
  
loop_ 
 _geom_hbond_atom_site_label_D 
 _geom_hbond_atom_site_label_H 
 _geom_hbond_atom_site_label_A 
 _geom_hbond_distance_DH 
 _geom_hbond_distance_HA 
 _geom_hbond_distance_DA 
 _geom_hbond_angle_DHA 
 _geom_hbond_site_symmetry_A 
C301 H301 O302  0.95 2.41 3.314(5) 157.9 . 
C302 H302 O303  0.95 2.29 3.231(5) 169.5 . 
C303 H303 O301  0.95 2.35 3.289(5) 168.3 . 
C304 H304 O305  0.95 2.36 3.305(5) 177.4 . 
C305 H305 O306  0.95 2.40 3.336(5) 169.7 . 
C306 H306 O304  0.95 2.32 3.260(5) 169.9 . 
C502 H502 O603  0.95 2.44 3.332(5) 156.6 1_465 
C503 H503 O601  0.95 2.32 3.254(5) 168.5 1_545 
C505 H505 O606  0.95 2.39 3.302(5) 160.1 1_645 
C506 H506 O604  0.95 2.36 3.258(6) 157.8 1_565 
  
_diffrn_measured_fraction_theta_max    0.993 
_diffrn_reflns_theta_full              26.02 
_diffrn_measured_fraction_theta_full   0.993 
_refine_diff_density_max    0.854 
_refine_diff_density_min   -0.631 
_refine_diff_density_rms    0.104 
